# Supplementary material
Source: publisher figshare collection journal article supplement (https://karger.figshare.com/ndownloader/files/22539755)
Supplement: Supplementary file 1 [file 22539755]

## Sheet: Sheet1
TABLE S2 Univariate and multivariate analyses of clinicopathological factors and OS in 120 stage I-III GC patients who underwent surgery
	Variables	Object	Control	Univariate analysisa P-value	Multivariate analysisb
					Hazard ratio (95% CI)	P-value		Hazard ratio (95% CI)	P-value
	Age	≥ 70	< 70	0.3514
	Gender	Male	Female	0.6482
	Histology	Undifferentiated	Differentiated	0.3939
	Depth of invasion	se, si	m, sm, mp, ss	< 0.01	1.90 (0.92-3.92)	0.0843		1.88 (0.91-3.88)	0.0895
	Lymph node metastasis	Positive	Negative	0.0001	3.20 (1.24-8.27)	0.0163		3.85 (1.49-9.94)	0.0054
	Lymphatic involvement	Positive	Negative	< 0.001
	Vascular involvement	Positive	Negative	< 0.05	1.07 (0.49-2.35)	0.8619		1.11 (0.50-2.44)	0.8039
	PD-1 mRNA levelc	Low	High	< 0.001	3.20 (1.20-8.58)	0.0205
	PD-L1 mRNA level	Low	High	0.7533
	CD8 mRNA levelc	Low	High	< 0.01				6.88 (0.93-51.2)	0.0596
aLog rank test, bCox proportional hazard model, cPD-1 and CD8 mRNA levels were included separately in the multivariate analysis since the correlation coefficient between these 2 factors was > 0.5
